# Supplementary material for: A simple ‘turn-on’ fluorescence chemosensor for Al(iii) detection in aqueous solution and solid matrix
Source: Royal Society of Chemistry journal article supplement (doi:10.1039/d3ra06558h), 2024-01-01
Supplement: d3ra06558h1.pdf [file d3ra06558h1.pdf]

## A simple 'turn-on' fluorescence chemosensor for Al(III) detection in aqueous solution and solid matrix

Cuiping Yang, Jianbo Zhao\*

School of Chemistry and Chemical Engineering, Tarim University, Alar 843300 (P. R.  
China), E-mail: zjb1102@outlook.com

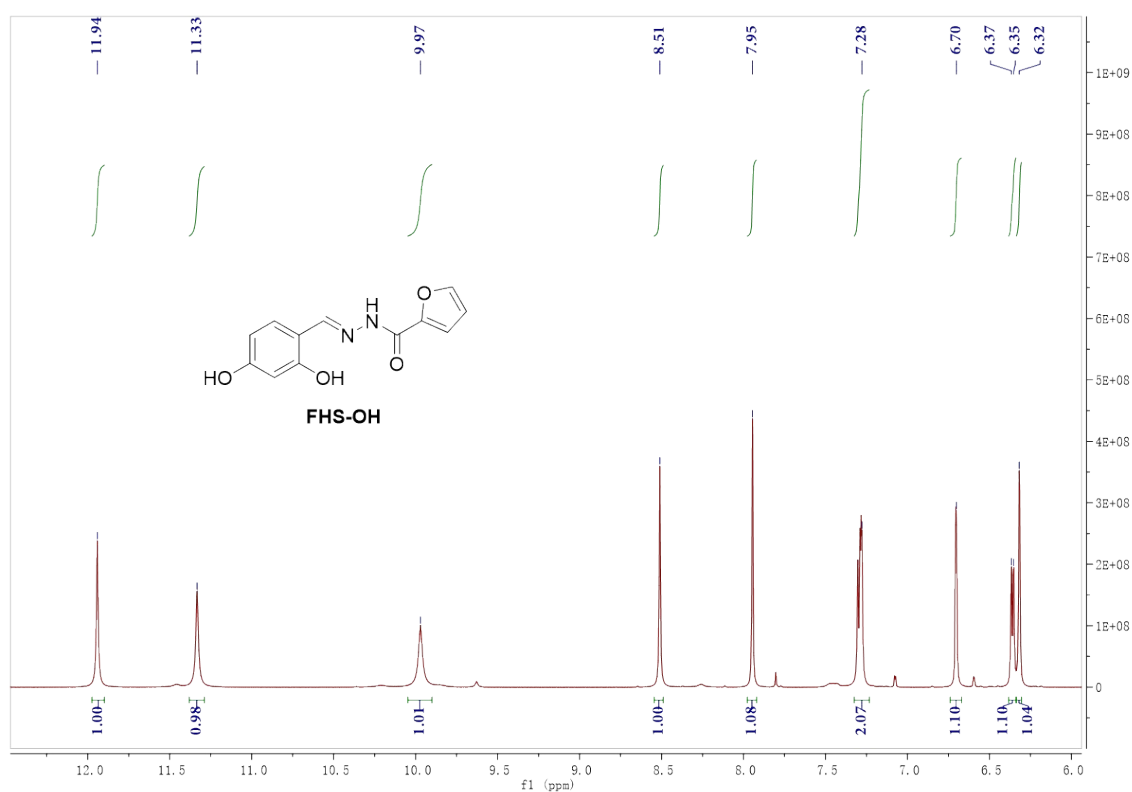

**Fig. S1.** <sup>1</sup>H-NMR spectrum of FHS-OH in DMSO-d<sub>6</sub>.

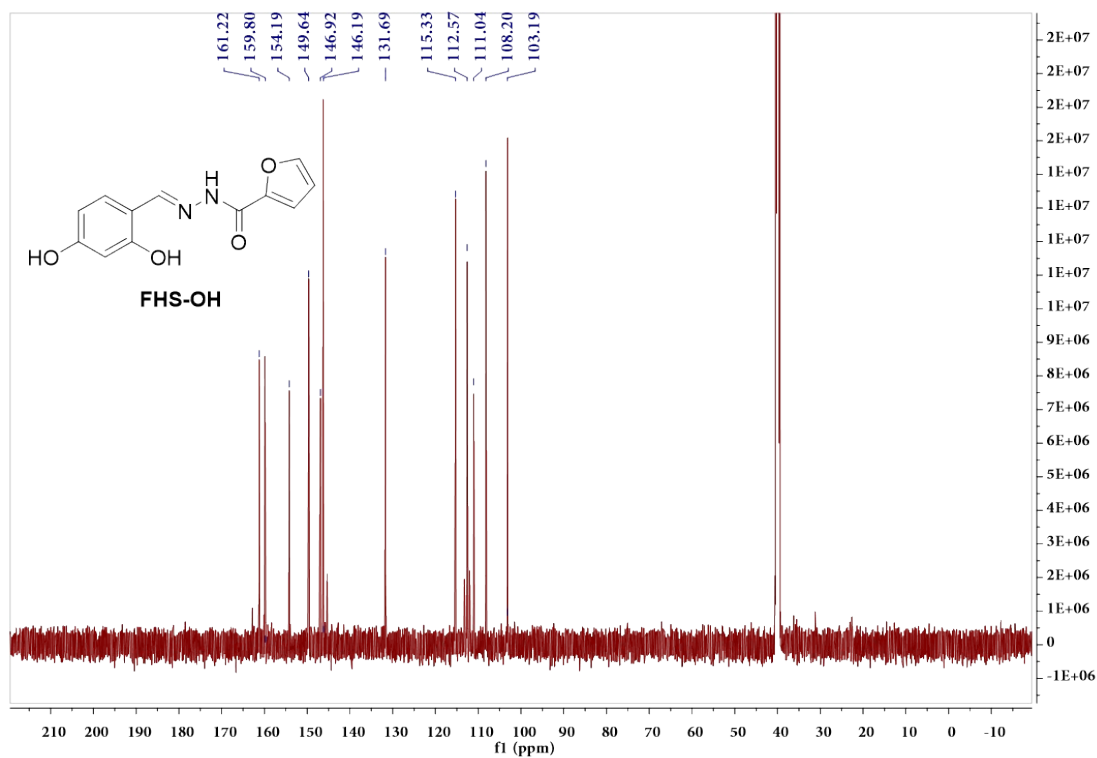

Fig. S2.  $^{13}\text{C}$ -NMR spectrum of **FHS-OH** in  $\text{DMSO-}d_6$ .

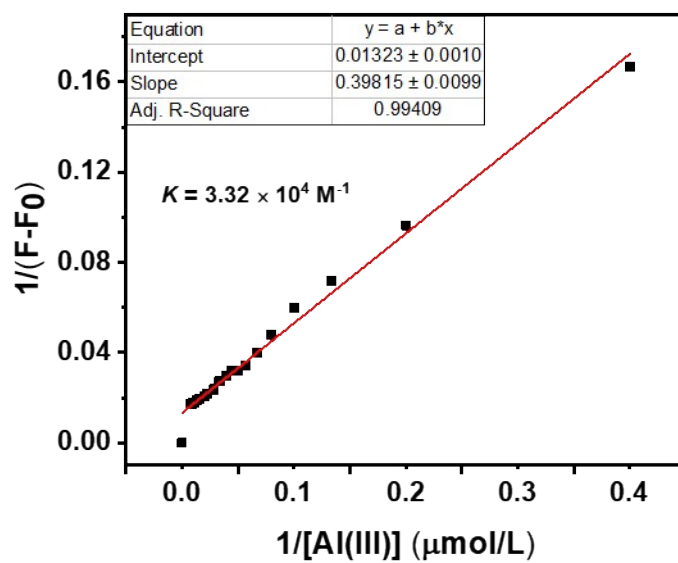

Fig. S3. Benesi-Hildebrand plot of **FHS-OH-Al(III)** complex.

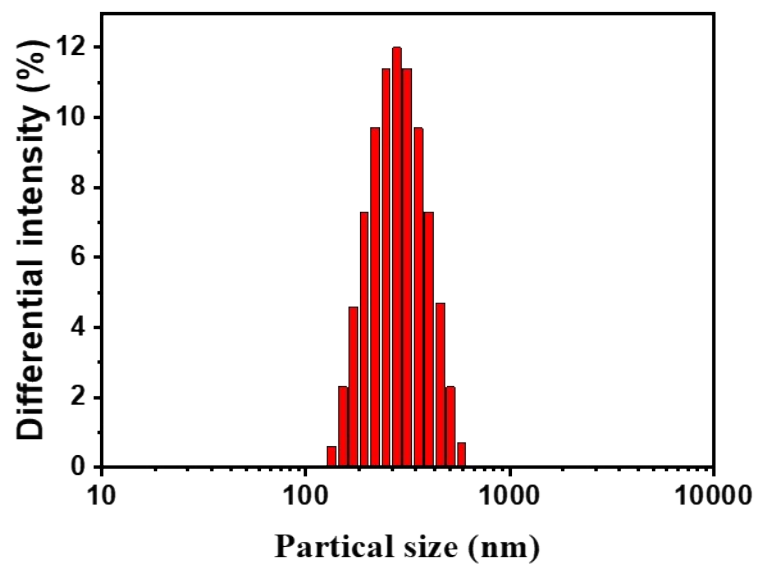

**Fig. S4.** DLS result of 50  $\mu\text{mol/L}$  **FHS-OH**. Condition: 99%  $\text{H}_2\text{O/DMSO}$  (v/v) at pH 7.4 buffered by 10 mmol/L PBS.
